# Supplementary material for: Comparing the effectiveness of five traditional Chinese exercises in improving balance function in older adults: a systematic review and Bayesian network meta-analysis
Source: PeerJ journal article supplement (doi:10.7717/peerj.18512), 2024-11-13
Supplement: Supplementary_Materials.docx [file Supplementary_Materials.docx]

**Comparing the Effectiveness of Five Traditional Chinese Exercises in Improving Balance Function in Older Adults: A Systematic Review and Network Meta-Analysis**

**Supplementary Materials**

**[Appendix A-Traditional Chinese exercises characteristics 2](#_Toc25189)**

**[Appendix B-Search strategy 3](#_Toc25189)**

**[Appendix C-Basic Characteristics of Included Studies 8](#_Toc17032)**

**[Appendix D-Risks of bias graph and summary for included RCTs 14](#_Toc23310)**

**[Appendix E-League Table 15](#_Toc7135)**

**[Appendix F-SUCRA Ranking 17](#_Toc3590)**

**[Appendix G-Funnel plot on publication bias 1](#_Toc3590)9**

# Appendix A-Traditional Chinese exercises characteristics

| Exercise | characteristics | number of movements | Strength | target group | limitations |
| --- | --- | --- | --- | --- | --- |
| Baduanjin | A full-body movement consisting of eight postures. | 8 | Flexibility and stability of the spine. | All ages | Without limit |
| Liuzijue | A kind of Qigong, combines breathing exercises of six different sounds, namely “Chui,” “Hu,” “Xi,” “He,” “Xu,” and “Si”. | 6 | Oxygen supply, walking stability | All ages | Without limit |
| Tai Chi | It includes multiple one-foot and two-foot power shifts, combined with meditative mind-body exercises. | 24 | Postural stability, lower limbs | All ages | Without limit |
| Wuqinxi | Imitating the movements of five animals (tiger, deer, bear, ape and crane). | 5 | Muscle strength, joint stability | All ages | Without limit |
| Yijinjing | A large number of stretching exercise. | 12 | Flexibility, joint range of motion, stretch the muscles | All ages | Without limit |

# Appendix B-Search strategy

| Database | Syntax |
| --- | --- |
| PUBMED | 1. "Tai Ji"[Mesh] 2. "Qigong"[Mesh] 3. baduanjin[Title/Abstract] 4. wuqinxi[Title/Abstract] 5. yijinjing[Title/Abstract] 6. ((((((((((Tai-ji[Title/Abstract]) OR (Tai Chi[Title/Abstract])) OR (Chi, Tai[Title/Abstract])) OR (Tai Ji Quan[Title/Abstract])) OR (Ji Quan, Tai[Title/Abstract])) OR (Quan, Tai Ji[Title/Abstract])) OR (Taiji[Title/Abstract])) OR (Taijiquan[Title/Abstract])) OR (Tai Chi[Title/Abstract])) OR (Tai Chi Chuan[Title/Abstract])) OR (Tai Ji[Title/Abstract]) 7. ("Tai Ji"[Mesh]) OR (((((((((((Tai-ji[Title/Abstract]) OR (Tai Chi[Title/Abstract])) OR (Chi, Tai[Title/Abstract])) OR (Tai Ji Quan[Title/Abstract])) OR (Ji Quan, Tai[Title/Abstract])) OR (Quan, Tai Ji[Title/Abstract])) OR (Taiji[Title/Abstract])) OR (Taijiquan[Title/Abstract])) OR (Tai Chi[Title/Abstract])) OR (Tai Chi Chuan[Title/Abstract])) OR (Tai Ji[Title/Abstract])) 8. ((old people[Title/Abstract]) OR (elderly[Title/Abstract])) OR (aged[Title/Abstract]) 9. "Aged"[Mesh] 10. ("Aged"[Mesh]) OR (((old people[Title/Abstract]) OR (elderly[Title/Abstract])) OR (aged[Title/Abstract])) 11. "Accidental Falls"[Mesh] 12. "Muscle Strength"[Mesh] 13. (((((Falls[Title/Abstract]) OR (Falling[Title/Abstract])) OR (Falls, Accidental[Title/Abstract])) OR (Slip[Title/Abstract] AND Fall[Title/Abstract])) OR (Fall[Title/Abstract] AND Slip[Title/Abstract])) OR (Accidental Fall[Title/Abstract]) 14. Balance[Title/Abstract] 15. ("Accidental Falls"[Mesh]) OR ((((((Falls[Title/Abstract]) OR (Falling[Title/Abstract])) OR (Falls, Accidental[Title/Abstract])) OR (Slip[Title/Abstract] AND Fall[Title/Abstract])) OR (Fall[Title/Abstract] AND Slip[Title/Abstract])) OR (Accidental Fall[Title/Abstract])) 16. ((((Arthrogenic Muscle Inhibition[Title/Abstract]) OR (Inhibition, Arthrogenic Muscle[Title/Abstract])) OR (Muscle Inhibition, Arthrogenic[Title/Abstract])) OR (Strength, Muscle[Title/Abstract])) OR (Arthrogenic Muscle Inhibitions[Title/Abstract]) 17. ("Muscle Strength"[Mesh]) OR (((((Arthrogenic Muscle Inhibition[Title/Abstract]) OR (Inhibition, Arthrogenic Muscle[Title/Abstract])) OR (Muscle Inhibition, Arthrogenic[Title/Abstract])) OR (Strength, Muscle[Title/Abstract])) OR (Arthrogenic Muscle Inhibitions[Title/Abstract])) 18. ("Muscle Strength"[Mesh]) OR (((((Arthrogenic Muscle Inhibition[Title/Abstract]) OR (Inhibition, Arthrogenic Muscle[Title/Abstract])) OR (Muscle Inhibition, Arthrogenic[Title/Abstract])) OR (Strength, Muscle[Title/Abstract])) OR (Arthrogenic Muscle Inhibitions[Title/Abstract])) 19. (((("Qigong"[Mesh]) OR (baduanjin[Title/Abstract])) OR (wuqinxi[Title/Abstract])) OR (yijinjing[Title/Abstract])) OR (("Tai Ji"[Mesh]) OR (((((((((((Tai-ji[Title/Abstract]) OR (Tai Chi[Title/Abstract])) OR (Chi, Tai[Title/Abstract])) OR (Tai Ji Quan[Title/Abstract])) OR (Ji Quan, Tai[Title/Abstract])) OR (Quan, Tai Ji[Title/Abstract])) OR (Taiji[Title/Abstract])) OR (Taijiquan[Title/Abstract])) OR (Tai Chi[Title/Abstract])) OR (Tai Chi Chuan[Title/Abstract])) OR (Tai Ji[Title/Abstract]))) 20. (((("Accidental Falls"[Mesh]) OR ((((((Falls[Title/Abstract]) OR (Falling[Title/Abstract])) OR (Falls, Accidental[Title/Abstract])) OR (Slip[Title/Abstract] AND Fall[Title/Abstract])) OR (Fall[Title/Abstract] AND Slip[Title/Abstract])) OR (Accidental Fall[Title/Abstract]))) OR (Balance[Title/Abstract]))) OR (("Muscle Strength"[Mesh]) OR (((((Arthrogenic Muscle Inhibition[Title/Abstract]) OR (Inhibition, Arthrogenic Muscle[Title/Abstract])) OR (Muscle Inhibition, Arthrogenic[Title/Abstract])) OR (Strength, Muscle[Title/Abstract])) OR (Arthrogenic Muscle Inhibitions[Title/Abstract]))) 21. (((((("Accidental Falls"[Mesh]) OR ((((((Falls[Title/Abstract]) OR (Falling[Title/Abstract])) OR (Falls, Accidental[Title/Abstract])) OR (Slip[Title/Abstract] AND Fall[Title/Abstract])) OR (Fall[Title/Abstract] AND Slip[Title/Abstract])) OR (Accidental Fall[Title/Abstract]))) OR (Balance[Title/Abstract]))) OR (("Muscle Strength"[Mesh]) OR (((((Arthrogenic Muscle Inhibition[Title/Abstract]) OR (Inhibition, Arthrogenic Muscle[Title/Abstract])) OR (Muscle Inhibition, Arthrogenic[Title/Abstract])) OR (Strength, Muscle[Title/Abstract])) OR (Arthrogenic Muscle Inhibitions[Title/Abstract])))) AND ((((("Qigong"[Mesh]) OR (baduanjin[Title/Abstract])) OR (wuqinxi[Title/Abstract])) OR (yijinjing[Title/Abstract])) OR (("Tai Ji"[Mesh]) OR (((((((((((Tai-ji[Title/Abstract]) OR (Tai Chi[Title/Abstract])) OR (Chi, Tai[Title/Abstract])) OR (Tai Ji Quan[Title/Abstract])) OR (Ji Quan, Tai[Title/Abstract])) OR (Quan, Tai Ji[Title/Abstract])) OR (Taiji[Title/Abstract])) OR (Taijiquan[Title/Abstract])) OR (Tai Chi[Title/Abstract])) OR (Tai Chi Chuan[Title/Abstract])) OR (Tai Ji[Title/Abstract]))))) AND (("Aged"[Mesh]) OR (((old people[Title/Abstract]) OR (elderly[Title/Abstract])) OR (aged[Title/Abstract])))   =541 |
| EMBASE | 1. 'tai chi'/exp 2. 'qigong'/exp 3. 'tai-ji':ab,ti 4. 'tai ji quan':ab,ti 5. 'ji quan, tai':ab,ti 6. 'tai ji':ab,ti 7. 'taijiquan':ab,ti 8. 'tai chi chuan':ab,ti 9. 'baduanjin':ab,ti 10. 'wuqinxi':ab,ti 11. 'yijinjing':ab,ti 12. 'qi gong':ab,ti 13. 'chi kung':ab,ti 14. #1 OR #2 OR #3 OR #4 OR #5 OR #6 OR #7 OR #8 OR #9 OR #10 OR #11 OR #12 OR #13 15. 'aged':ab,ti 16. 'elderly':ab,ti 17. 'old people':ab,ti 18. #15 OR #16 OR #17 19. 'accidental falls':ab,ti 20. 'falls':ab,ti 21. 'falling':ab,ti 22. 'accidental fall':ab,ti 23. 'slip and fall':ab,ti 24. 'balance':ab,ti 25. 'muscle strength':ab,ti 26. 'arthrogenic muscle inhibition':ab,ti 27. 'arthrogenic muscle inhibitions':ab,ti 28. #19 OR #20 OR #21 OR #22 OR #23 OR #24 OR #25 OR #26 29. 'randomized controlled trial'/exp 30. #14 AND #18 AND #28 AND #30   =342 |
| COCHRANE | 1. MeSH descriptor: [Tai Ji] explode all trees 2. MeSH descriptor: [Qigong] explode all trees 3. (Tai Chi):ti,ab,kw OR (Chi, Tai):ti,ab,kw OR (Tai ji Quan):ti,ab,kw OR (Ji Quan, Tai):ti,ab,kw OR (Quan, Tai Ji):ti,ab,kw 4. (Taiji):ti,ab,kw OR (Taijiquan):ti,ab,kw OR (Tai Chi Chuan):ti,ab,kw OR (baduanjin):ti,ab,kw OR (wuqinxi):ti,ab,kw 5. (yijinjing):ti,ab,kw OR (Qigong):ti,ab,kw OR (Qi Gong):ti,ab,kw OR (Chi Kung):ti,ab,kw 6. #1 OR #2 OR #3 OR #4 OR #5 7. MeSH descriptor: [Aged] explode all trees 8. (elderly):ti,ab,kw OR (old people):ti,ab,kw 9. #7 OR #8 10. MeSH descriptor: [Accidental Falls] explode all trees 11. (Falls):ti,ab,kw OR (falling):ti,ab,kw OR (Slip and Fall):ti,ab,kw OR (Balance):ti,ab,kw OR (Arthrogenic Muscle Inhibition):ti,ab,kw 12. MeSH descriptor: [Muscle Strength] explode all trees 13. #10 OR #11 OR #12 14. (randomized controlled trail): ti, ab,kw OR (randomly):ti,ab,kw 15. #6 AND #9 AND #13 AND #14   =209 |
| WEB OF SCIENCE | 1. "TS=(Tai Ji) OR TS=(Tai chi) OR TS= (Chi Tai) OR TS=(Tai Ji Quan) OR TS=(Ji Quan, Tai) OR 2. TS=(Quan Tai Ji) OR TS=(Quan, Tai Ji) OR TS=(TaiJi) OR TS=(Taijiquan) OR TS=(Tai Chi Chuan) OR TS=(Baduanjin) OR TS=(wuqinxi) OR TS=(yijinjing) OR TS=(qigong) OR TS=(Qi Gong) OR TS=(Chi Kung) 3. "TS=(Accidental Falls) OR TS=(Falls) OR TS= (Falling) OR TS=(Falls, Accidental) OR TS=(Accidental Fall) OR TS=(Slip and Fall) OR TS=(Balance) OR TS=(Muscle Strength) OR TS=(Arthrogenic Muscle Inhibition) 4. "TS=(aged) OR TS=(elderly) OR TS= (old people)” 5. “TS=( randomized controlled trial) OR TS= (randomly) 6. "#1 AND #2 AND #3 AND #4 AND #5"   =1173 |
| CNKI | SU =('太极' + '六字诀' + '五禽戏' + '易筋经' + '八段锦') AND SU=（'老年人' +'老人' +'老龄+老年'）AND SU =('平衡' + '下肢肌力' + '跌倒' + '滑倒')  =44 |
| Wan Fang | 主题:("太极" or "六字诀" or "五禽戏" or "易筋经" or "八段锦") and 主题:("老年人" or “老人” or “老龄” or “老年”) and 主题:("平衡" or "下肢肌力" or "跌倒" or "滑倒")  =41 |
| VIP database | 主题:("太极" or "六字诀" or "五禽戏" or "易筋经" or "八段锦") and 主题:("老年人" or “老人” or “老龄” or “老年”) and 主题:("平衡" or "下肢肌力" or "跌倒" or "滑倒")  =30 |

# Appendix C-Basic Characteristics of Included Studies

| **Reference** | **Country/Area** | **Sample size** | **Gender (M/F)** | **Average Age** | **Duration (min*times*week)** |
| --- | --- | --- | --- | --- | --- |
|
| **SLSC** | | | | | |
| Audette, 2006 | USA | Tai chi: 11  Control: 8 | F19 | 71.5±4.6  71.3±4.4 | Tai chi: 60*3*12  Brisk walking: 60*3*12 |
| Chen, 2021 | Taiwan | Tai chi: 36  Control: 32 | M6/F62 | 77.4 ± 5.9  75.4 ± 6.4 | Tai chi: 60*2*12 |
| Cui, 2018 | China | Tai chi: 45  Control: 45 | M40/F50 | 66.82±5.23  67.25±5.11 | Tai chi: 60*7*12  Brisk walking: 60*7*12 |
| Hu, 2007 | Japan | Tai chi: 27  Control: 24 | M29/F25 | 64.0±2.8  64.2±2.9 | Tai chi: 60*1*12 |
| Huang, 2022 | China | Yijinjing: 26  Control: 21 | M11/F36 | 62.0±5.0  63.5±4.7 | Yijinjing: 60*5*24 |
| Li, 2005 | USA | Tai chi: 25  Control: 131 | M77/F179 | 76.94±4.69  77.99±5.14 | Tai chi: 60*3*26 |
| Li, 2008 | Hong Kong | Tai Chi: 22  Control: 18 | M20/F20 | 64.9±3.2  65.6±3.5 | Tai chi: 60*4*16 |
| Li, 2019 | China | Baduanjin: 44  Control: 44 | M28/F60 | 65.5 ±5.1  65.5 ±5.1 | Baduanjin: (30-40)*7*24 |
| Lu, 2015 | China | Tai chi: 31  Control: 30 | F61 | 62.14±5.52  62.85±5.29 | Tai chi: 40*6*52  Walking: 40*6*52 |
| Sun, 2008 | China | Baduanjin: 19  Control: 20 | M39 | 65.7±2.3  64.8±2.3 | Baduanjin: (40-50)*5*12 |
| Sun, 2019 | China | Tai chi: 12  Control: 11 | F23 | 64.12 ± 3.21  65.36 ± 4.31 | Tai chi: 60*5*16 |
| Yao, 2008 | China | Tai chi: 21  Control: 20 | F41 | 64.2±3.58  65.4±3.60 | Tai chi: 60*(5-7)*24 |
| Yildirim, 2016 | Turkey | Tai chi: 30  Control: 30 | M7/F53 | 62.9±6.5  64.4±7.5 | Tai chi: 60*3*12  Combined exercise prescription: 60*3*12 |
| Zhai, 2013 | China | Baduanjin: 22  Control: 22 | M40 | 64.9+2.5  64.8+2.7 | Baduanjin: (40-50)*5*8 |
| Zhu, 2008 | China | Wuqinxi: 45  Control: 30 | F75 | 63.4±1.8  62.8±1.4 | Wuqinxi: 45*7*16 |
| Zhu, 2016 | China | Tai chi: 30  Control: 30 | M23/F37 | 64±4  64±3 | Tai chi: 120*5*18 |
| **TUGT** |  |  |  |  |  |
| Aviles, 2019 | USA | Tai chi: 27  Control: 32 | M35/F24 | 82.6±4.5  80.9±6.2 | Tai chi 30*3*4  Reactive Balance Training 30*3*4 |
| Cao, 2021 | China | Wuqinxi: 31  Control: 31 | M41/F21 | 62.45±2.87  62.97±3.27 | Wuqinxi 30*5*8  Regular exercise 30*5*8 |
| Fang, 2020 | China | Yijinjing: 18  Control: 18 | M12/F24 | 82.8±8.5  76.3±9.9 | Yijinjing: (25-30)*3*24  Regular exercise: (25-30)*3*24 |
| Gatts, 2006 | USA | Tai chi: 11  Control: 8 | M2/F17 | 77.55 | Tai chi: 90*5*3 |
| Hu, 2007 | Japan | Tai chi: 27  Control: 24 | M29/F25 | 64.0±2.8  64.2±2.9 | Tai chi: 60*1*12 |
| Huang, 2010 | Taiwan | Tai chi:31  Control:47 | M50/F28 | 71.40±0.49  71.50±1.01 | Tai chi40*3*20 |
| Kim, 2020 | Korea | Tai chi: 23  Taekkyon: 23 | F46 | 71.4±3.3  70.9±4.3 | Tai chi: 60*2*12  Taekkyon: 60*2*12 |
| Li, 2005 | USA | Tai chi: 25  Control: 131 | M77/F179 | 76.94±4.69  77.99±5.14 | Tai chi: 60*3*26 |
| Li, 2019 | China | Baduanjin: 44  Control: 44 | M28/F60 | 65.5 ±5.1  65.5 ±5.1 | Baduanjin: (30-40)*7*24 |
| Li, 2021 | USA | Tai chi: 15  Control: 15 | M9/F21 | 76.13±6.2  76.20±6.3 | Tai chi: 60*2*24  Stretching exercise: 60*2*24 |
| Penn, 2019 | Taiwan | Tai chi: 15  Control: 15 | M15/F25 | 75.27 ± 5.20  73.4 ± 8.2 | Tai chi: 30*3*8 |
| Pluchino, 2012 | USA | Tai chi: 11  Control: 8 | M22/F12 | 62.9±6.5  70.72±8.46 | Tai chi: 60*2*8 |
| Son, 2016 | Korea | Tai chi: 21  Control: 24 | M22/F96 | 71.5±3.6  72.8±4.7 | Tai chi: 60*2*12  Otago: 60*2*12 |
| Song, 2022 | China | Tai chi: 20  Control: 20 | F40 | 64.15 ± 8.56  64.15 ± 8.56 | Tai chi: 60*3*12 |
| Taylor, 2012 | Australia | Tai chi: 233  Control: 231 | M127/F337 | 75.3±7.0  73.7±6.2 | Tai chi: 60*2*20  Low-level exercise program control group: 60*2*20 |
| Tousignant, 2012 | Canada | Tai chi: 76  Control: 76 | M54/F146 | 79.1±6.4  80.7±6.0 | Tai chi: 60*2*15 |
| Wang, 2020 | China | Liuzijue: 20  Control: 21 | M23/F18 | 64.23±5.14  64.64±7.43 | Liuzijue: 45*5*6  Regular exercise: 90*5*6 |
| Xiao, 2016 | China | Baduanjin: 48  Control: 48 | M67/F29 | 68.17±2.27  66.52±2.13 | Baduanjin 45*4*24 + Walk: 30*7*48  Walking: 30*7*48 |
| Xiao, 2021 | China | Wuqinxi: 34  Control: 34 | M23/F45 | 70.7±9.36  70.2±10.35 | Wuqinxi: 60*4*12 + Walking: 30*7*12  Aerobic training: 30*4*12 |
| Yildirim, 2016 | Turkey | Tai chi: 30  Control: 30 | M7/F53 | 62.9±6.5  64.4±7.5 | Tai chi: 60*3*12  Combined exercise prescription: 60*3*12 |
| Zhang, 2015 | China | Tai chi: 20  Control: 20 | M23/F16 | 66.00 ±11.80  64.35±10.53 | Tai chi: 60*2*12  Multimodal exercise training: 60*2*12 |
| **BBS** |  |  |  |  |  |
| Aviles, 2019 | USA | Tai chi:27  Control:32 | M35/F24 | 82.6±4.5  80.9±6.2 | Tai chi 30*3*4  Reactive Balance Training 30*3*4 |
| Cao, 2021 | China | Wuqinxi:31  Control:31 | M41/F21 | 62.45±2.87  62.97±3.27 | Wuqinxi 30*5*8  Regular exercise 30*5*8 |
| Li, 2005 | USA | Tai chi: 25  Control: 131 | M77/F179 | 76.94±4.69  77.99±5.14 | Tai chi: 60*3*26 |
| Li, 2019 | China | Baduanjin: 44  Control: 44 | M28/F60 | 65.5 ±5.1  65.5 ±5.1 | Baduanjin: (30-40)*7*24 |
| Logghe, 2009(Logghe et al. 2009) | Netherlands | Tai chi: 138  Control: 131 | M78/F191 | 77.5±4.7  76.8±4.6 | Tai chi: 60*2*13 |
| Luo, 2022 | China | Yijinjing: 24  Control: 24 | M38/F10 | 66.25±6.24  68.08±5.90 | Yijinjing: 100+30*5*4  Regular exercise: 100*5*4 |
| Penn, 2019 | Taiwan | Tai chi: 15  Control: 15 | M15/F25 | 75.27 ± 5.20  73.4 ± 8.2 | Tai chi: 30*3*8 |
| Saravanakumar, 2014 | Australia | Tai chi: 11  Control: 11 | M5/F15 | 81.1±8.0  85.4±9.1 | Tai chi: 30*2*14 |
| Song, 2022 | China | Tai chi: 20  Control: 20 | F40 | 64.15 ± 8.56  64.15 ± 8.56 | Tai chi: 60*3*12 |
| Tousignant, 2012 | Canada | Tai chi: 76  Control: 76 | M54/F146 | 79.1±6.4  80.7±6.0 | Tai chi: 60*2*15 |
| Wang, 2022 | China | Liuzijue: 32  Control: 31 | M48/F15 | 65.25±9.21  60.65±12.21 | Liuzijue: 35+20*5*4  Regular exercise: 35*5*4 |
| Xiao, 2016 | China | Baduanjin: 48  Control: 48 | M67/F29 | 68.17±2.27  66.52±2.13 | Baduanjin 45*4*24 + Walk: 30*7*48  Walking: 30*7*48 |
| Xiao, 2021 | China | Wuqinxi: 34  Control: 34 | M23/F45 | 70.7±9.36  70.2±10.35 | Wuqinxi: 60*4*12 + Walking: 30*7*12  Aerobic training: 30*4*12 |
| Yildirim, 2016 | Turkey | Tai chi: 30  Control: 30 | M7/F53 | 62.9±6.5  64.4±7.5 | Tai chi: 60*3*12  Combined exercise prescription: 60*3*12 |
| Zhang, 2015 | China | Tai chi: 20  Control: 20 | M23/F16 | 66.00 ±11.80  64.35±10.53 | Tai chi: 60*2*12  Multimodal exercise training: 60*2*12 |
| Zhang, 2023 | China | Wuqinxi: 32  Control: 28 | F34/M26 | 60.21 ± 9.02  60.25 ± 9.03 | Wuqinxi: (30-50)*5*12  Regular exercise: 40*3*12 |
| Zheng, 2021 | China | Liuzijue: 30  Control: 30 | M43/F17 | 63.50±10.36  67.23±9.15 | Rehabilitation training + Liuzijue: 45*5*3 |
| Zhu, 2016 | China | Tai chi: 30  Control: 30 | M23/F37 | 64±4  64±3 | Tai chi: 120*5*18 |
| **6MWT** |  |  |  |  |  |
| An, 2008 | China | Baduanjin:14  Control:14 | F28 | 65.4±8.2  64.6±6.7 | Badaunjin 30*5*8 |
| Chan, 2013 | Hong Kong | Tai chi: 70  Control: 67 | M10/F127 | 71.7±8.2  73.6±7.4 | Tai chi: 60*1*12 |
| Kantatong, 2019 | Thailand | Tai chi: 25  Control: 25 | M34/F16 | 69.68±7.67  67.48±10.17 | Tai chi: Unknown*(3-5)*24 |
| Li, 2018 | China | Liuzijue: 17  Control: 19 | M28/F8 | 66±9  66±9 | Liuzijue: 60*6*26 |
| Li, 2019 | China | Tai chi: 54  Control: 53 | M50/F57 | 69.6±4.3  68.5±3.5 | Tai chi: 45*5*14  Regular exercise: 45*7*14 |
| Xiao, 2016 | China | Baduanjin: 48  Control: 48 | M67/F29 | 68.17±2.27  66.52±2.13 | Baduanjin: 45*4*24 + Walking: 30*7*48  Walking: 30*7*48 |
| Xiao, 2021 | China | Wuqinxi: 34  Control: 34 | M23/F45 | 70.7±9.36  70.2±10.35 | Wuqinxi: 60*4*12 + Walking: 30*7*12  Aerobic training: 30*4*12 |
| **SF-36PCS** |  |  |  |  |  |
| An, 2008 | China | Baduanjin:14  Control:14 | F28 | 65.4±8.2  64.6±6.7 | Badaunjin 30*5*8 |
| Li, 2019 | China | Baduanjin: 44  Control: 44 | M28/F60 | 65.5 ±5.1  65.5 ±5.1 | Baduanjin: (30-40)*7*24 |
| Song, 2022 | China | Tai chi: 20  Control: 20 | F40 | 64.15 ± 8.56  64.15 ± 8.56 | Tai chi: 60*3*12 |
| Wu, 2015 | China | Baduanjin: 20  Control: 20 | NA | 63.9±7.6  65.3±6.0 | Baduanjin: 30*5*12 |
| Xiao, 2015 | China | Liuzijue: 63  Control: 63 | M9/F117 | 72.2±1.7  70.9±1.4 | Liuzijue: 45*4*26 + Walking: 30*7*26  Walking: 30*7*26 |

Note. M = Male(s); F = Female(s); SLSC, Single-leg stand with eyes closed; TUGT, Time up and go test; BBS, Berg balance scale; 6MWT, 6 minutes walking test; the SF-36PCS, Medical Outcomes Study 36-Item Physical Component Summary, Physical Component Summary.

# Appendix D-Risks of bias figures and tables for included RCTs

**
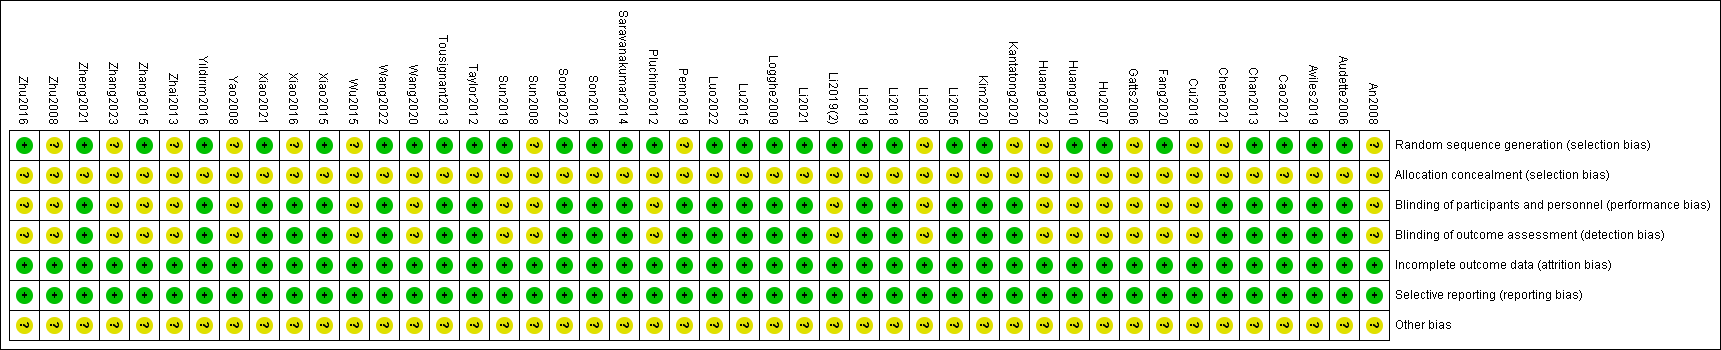
**

**(a) Risk of bias graph: an overall risk of bias of each domain**

**
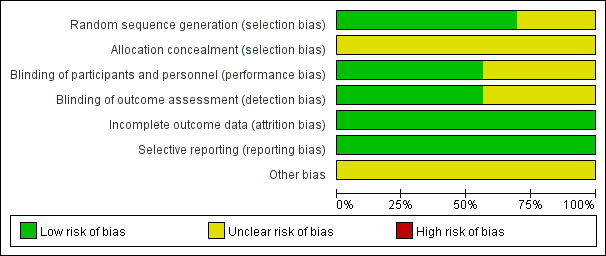
**

**(b) Risk of bias summary: the risk of bias of each domain in each study.**

**(c) Risk of bias details: an overall risk of bias of each domain**

| Study ID | Random sequence generation | Allocation concealment | Blinding of participants and personnel | Blinding of outcome assessment | Incomplete outcome data | Selective reporting | Other bias |
| --- | --- | --- | --- | --- | --- | --- | --- |
| An2008 | unclear | unclear | unclear | unclear | low risk | low risk | unclear |
| Audette2006 | low risk | unclear | low risk | low risk | low risk | low risk | unclear |
| Aviles2019 | low risk | unclear | low risk | low risk | low risk | low risk | unclear |
| Cao2021 | low risk | unclear | low risk | low risk | low risk | low risk | unclear |
| Chan2013 | low risk | unclear | low risk | low risk | low risk | low risk | unclear |
| Chen2021 | unclear | unclear | low risk | low risk | low risk | low risk | unclear |
| Cui2018 | unclear | unclear | unclear | unclear | low risk | low risk | unclear |
| Fang2020 | low risk | unclear | unclear | unclear | low risk | low risk | unclear |
| Gatts2006 | unclear | unclear | unclear | unclear | low risk | low risk | unclear |
| Hu2007 | low risk | unclear | unclear | unclear | low risk | low risk | unclear |
| Huang2010 | low risk | unclear | unclear | unclear | low risk | low risk | unclear |
| Huang2022 | unclear | unclear | unclear | unclear | low risk | low risk | unclear |
| Kantatong2020 | unclear | unclear | low risk | low risk | low risk | low risk | unclear |
| Kim2020 | low risk | unclear | low risk | low risk | low risk | low risk | unclear |
| Li2005 | low risk | unclear | low risk | low risk | low risk | low risk | unclear |
| Li2008 | unclear | unclear | unclear | unclear | low risk | low risk | unclear |
| Li2018 | low risk | unclear | low risk | low risk | low risk | low risk | unclear |
| Li2019 | low risk | unclear | low risk | low risk | low risk | low risk | unclear |
| Li2019(2) | low risk | unclear | unclear | unclear | low risk | low risk | unclear |
| Li2021 | low risk | unclear | low risk | low risk | low risk | low risk | unclear |
| Logghe2009 | low risk | unclear | low risk | low risk | low risk | low risk | unclear |
| Lu2015 | low risk | unclear | low risk | low risk | low risk | low risk | unclear |
| Luo2022 | low risk | unclear | low risk | low risk | low risk | low risk | unclear |
| Penn2019 | unclear | unclear | low risk | low risk | low risk | low risk | unclear |
| Pluchino2012 | low risk | unclear | unclear | unclear | low risk | low risk | unclear |
| Saravanakumar2014 | low risk | unclear | low risk | low risk | low risk | low risk | unclear |
| Son2016 | low risk | unclear | low risk | low risk | low risk | low risk | unclear |
| Song2022 | low risk | unclear | low risk | low risk | low risk | low risk | unclear |
| Sun2008 | unclear | unclear | unclear | unclear | low risk | low risk | unclear |
| Sun2019 | low risk | unclear | unclear | unclear | low risk | low risk | unclear |
| Taylor2012 | low risk | unclear | low risk | low risk | low risk | low risk | unclear |
| Tousignant2013 | low risk | unclear | low risk | low risk | low risk | low risk | unclear |
| Wang2020 | low risk | unclear | unclear | unclear | low risk | low risk | unclear |
| Wang2022 | low risk | unclear | low risk | low risk | low risk | low risk | unclear |
| Wu2015 | unclear | unclear | unclear | unclear | low risk | low risk | unclear |
| Xiao2015 | low risk | unclear | low risk | low risk | low risk | low risk | unclear |
| Xiao2016 | unclear | unclear | low risk | low risk | low risk | low risk | unclear |
| Xiao2021 | low risk | unclear | low risk | low risk | low risk | low risk | unclear |
| Yao2008 | unclear | unclear | unclear | unclear | low risk | low risk | unclear |
| Yildirim2016 | low risk | unclear | low risk | low risk | low risk | low risk | unclear |
| Zhai2013 | unclear | unclear | unclear | unclear | low risk | low risk | unclear |
| Zhang2015 | low risk | unclear | unclear | unclear | low risk | low risk | unclear |
| Zhang2023 | unclear | unclear | unclear | unclear | low risk | low risk | unclear |
| Zheng2021 | low risk | unclear | low risk | low risk | low risk | low risk | unclear |
| Zhu2008 | unclear | unclear | unclear | unclear | low risk | low risk | unclear |
| Zhu2016 | low risk | unclear | unclear | unclear | low risk | low risk | unclear |

# Appendix E-League Table

| League Table | | | | | |
| --- | --- | --- | --- | --- | --- |
| B1. SLSC League Table | | | | | |
| Baduanjin |  |  |  |  |  |
| 2.71 (-2.3, 7.72) | Control |  |  |  |  |
| -0.84 (-6.91, 4.56) | -3.57 (-6.66, -1.12) | Taichi |  |  |  |
| -0.23 (-10.2, 9.84) | -2.95 (-11.62, 5.81) | 0.62 (-8.17, 10.08) | Wuqinxi |  |  |
| 1.71 (-11.16, 14.54) | -1 (-12.89, 10.91) | 2.61 (-9.4, 14.99) | 1.92 (-12.79, 16.63) | Yijinjing |  |
| B2. TUGT League Table | | | | | |
| Baduanjin |  |  |  |  |  |
| -2.49 (-5.06, 0.16) | Control |  |  |  |  |
| 4.28 (-0.85, 9.42) | 6.76 (2.35, 11.17) | Liuzijue |  |  |  |
| -2.52 (-5.25, 0.27) | -0.03 (-0.89, 0.79) | -6.79 (-11.28, -2.31) | Taichi |  |  |
| -0.41 (-3.8, 3.05) | 2.08 (-0.11, 4.28) | -4.68 (-9.62, 0.25) | 2.11 (-0.22, 4.48) | Wuqinxi |  |
| 0.32 (-4.14, 4.8) | 2.8 (-0.82, 6.43) | -3.97 (-9.64, 1.75) | 2.82 (-0.88, 6.57) | 0.72 (-3.51, 4.97) | Yijinjing |
| B3. BBS League Table | | | | | |
| Baduanjin |  |  |  |  |  |
| 5.04 (2.67, 7.24) | Control |  |  |  |  |
| 0.23 (-3.91, 4.26) | -4.8 (-8.22, -1.4) | Liuzijue |  |  |  |
| 4.2 (1.64, 6.59) | -0.85 (-1.77, 0.1) | 3.95 (0.44, 7.51) | Taichi |  |  |
| 2.12 (-0.73, 4.85) | -2.92 (-4.52, -1.27) | 1.88 (-1.87, 5.69) | -2.08 (-3.93, -0.17) | Wuqinxi |  |
| -0.78 (-4.98, 3.37) | -5.8 (-9.31, -2.29) | -1 (-5.89, 3.91) | -4.96 (-8.58, -1.33) | -2.88 (-6.74, 0.95) | Yijinjing |
| B4. 6WMT League Table | | | | | |
| Baduanjin |  |  |  |  |  |
| 7.09 (-1.57, 15.71) | Control |  |  |  |  |
| -4.28 (-14.4, 5.81) | -11.36 (-16.58, -6.2) | Liuzijue |  |  |  |
| -35.93 (-52.3, -19.58) | -42.98 (-56.89, -29.05) | -31.61 (-46.46, -16.75) | Taichi |  |  |
| 10.35 (-23.43, 43.85) | 3.27 (-29.36, 35.66) | 14.62 (-18.4, 47.47) | 46.26 (10.75, 81.4) | Wuqinxi |  |
| B5. SF-36PCS League Table | | | | |  |
| Baduanjin |  |  |  |  |  |
| 2.18 (-3.09, 7.47) | Control |  |  |  |  |
| -2.32 (-7.92, 3.28) | -4.5 (-6.36, -2.65) | Liuzijue |  |  |  |
| -6.78 (-12.07, -1.44) | -8.95 (-9.59, -8.32) | -4.45 (-6.41, -2.49) | Taichi |  |  |

# Appendix F-SUCRA Ranking

| SUCRA Ranking | | | |
| --- | --- | --- | --- |
| SLSC | | TUGT | |
| Tai Chi | 71.7% | Liuzijue | 96.6% |
| Wuqinxi | 58.7% | Yijinjing | 63.1% |
| Baduanjin | 58.3% | Baduanjin | 60.5% |
| Yijinjing | 42% | Wuqinxi | 54.6% |
| Control | 19.3% | Control | 13.1% |
| - | - | Tai Chi | 12.2% |
| BBS | | 6WMT | |
| Yijinjing | 84.5% | Tai Chi | 99.8% |
| Baduanjin | 76.9% | Liuzijue | 65.1% |
| Liuzijue | 72.2% | Baduanjin | 46.8% |
| Wuqinxi | 45.5% | Wuqinxi | 22.3% |
| Tai Chi | 20.1% | Control | 15.7% |
| Control | 0.9% | - | - |
| SF-36 PCS | |  |  |
| Tai Chi | 99.7% |  |  |
| Liuzijue | 59.7% |  |  |
| Baduanjin | 33.4% |  |  |
| Control | 6.9% |  |  |

# Appendix G-Funnel plot on publication bias


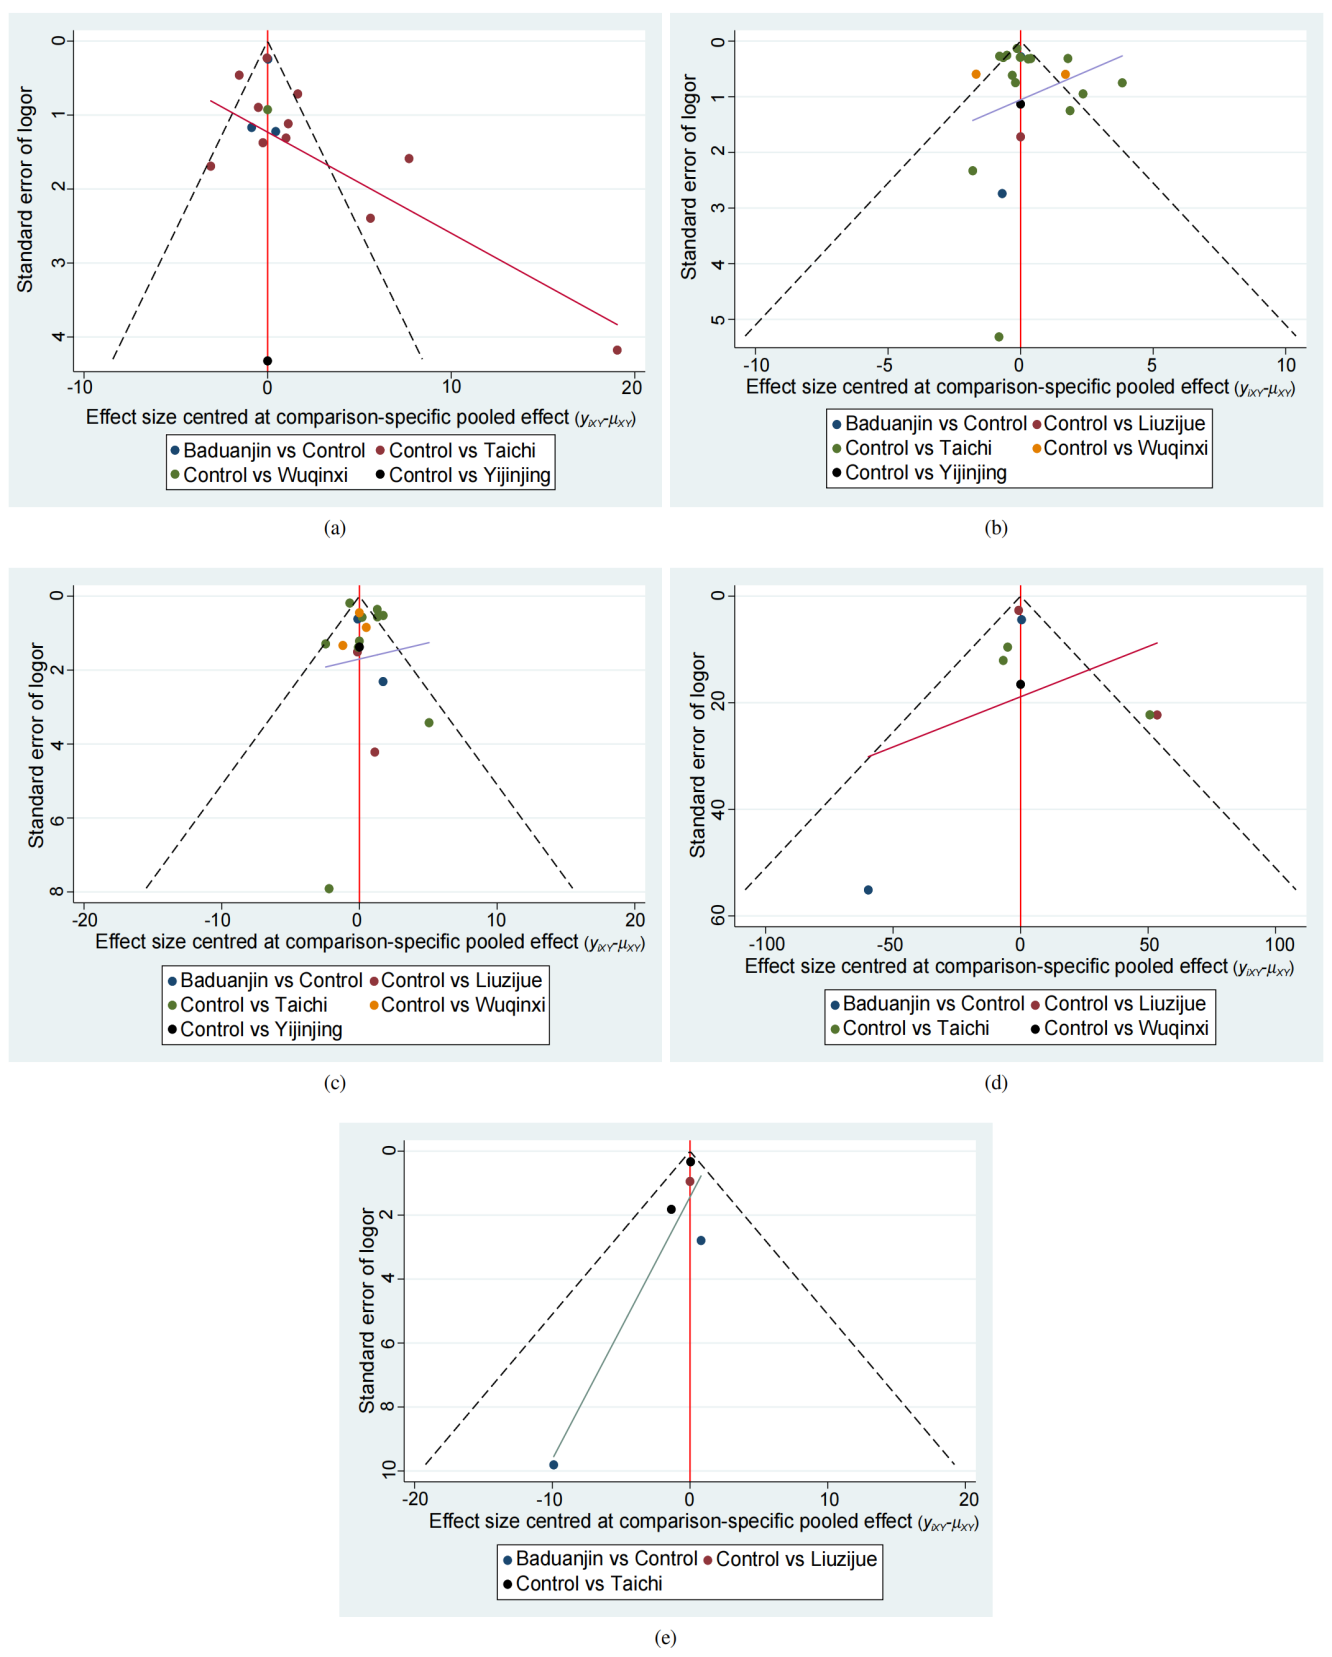


Appendix G-Funnel plot on publication bias. (a) SLSC (b) TUGT (c) BBS (d) 6MWT (e) SF-36PCS.

**Reference**

An, B., Dai, K., Zhu, Z., Wang, Y., Hao, Y., Tang, T., & Yan, H. (2008). Baduanjin alleviates the symptoms of knee osteoarthritis. *The Journal of Alternative and Complementary Medicine, 14*(2), 167-174.

Audette JF, Jin YS, Newcomer R, Stein L, Duncan G, & Frontera WR. (2006). Tai Chi versus brisk walking in elderly women. *Age Ageing, 35*(4), 388-393. doi:10.1093/ageing/afl006

Aviles, J., Allin, L. J., Alexander, N. B., Van Mullekom, J., Nussbaum, M. A., & Madigan, M. L. (2019). Comparison of treadmill trip-like training versus Tai Chi to improve reactive balance among independent older adult residents of senior housing: a pilot controlled trial. *The Journals of Gerontology: Series A, 74*(9), 1497-1503.

Cao HH, Sun WY, Xi XM, Wang LM, & Bi HY. (2021). Effects of Wuqinxi on Balance, Walking and Quality of Life for Patients with Parkinson's Disease. *Chinese J Rehabilitation Theory Pract, 27*(9), 1087-1092. doi:doi:10.3969/j.issn.1006-9771.2021.09.014.

Chan, A. W. K., Lee, A., Lee, D. T. F., Suen, L. K. P., Tam, W. W. S., Chair, S. Y., & Griffiths, P. (2013). The sustaining effects of Tai chi Qigong on physiological health for COPD patients: A randomized controlled trial. *Complementary Therapies in Medicine, 21*(6), 585-594. doi:10.1016/j.ctim.2013.09.008

Chen, P. Y., Song, C. Y., Yen, H. Y., Lin, P. C., Chen, S. R., Lu, L. H., Lin, C. H. (2021). Impacts of tai chi exercise on functional fitness in community-dwelling older adults with mild degenerative knee osteoarthritis: a randomized controlled clinical trial. *BMC Geriatr, 21*(1), 449. doi:10.1186/s12877-021-02390-9

Cui YC. (2018). Evaluation of the effect of core muscle strength and Taijiquan cat walking exercise on the elderly physical stability. *Chinese J Gerontol, 38*(22), 5481-5483.

Fang, L., Li, Z., Tao, X., & Luo, J. (2020). Effects of Yi Jin Jing on the risk of falling of sarcopenia and disequilibrium elderly. *Chin. J. Rehabil. Med, 35*, 319-323.

Gatts, S. K., & Woollacott, M. H. (2006). Neural mechanisms underlying balance improvement with short term Tai Chi training. *Aging clinical and experimental research, 18*, 7-19.

Hu, X. (2007). Effects of Tai Chi on functional fitness and subjective health status in older Japanese returnees from China: A randomized controlled trial. *Japanese Journal of Physical Fitness and Sports Medicine*, 409-418.

Huang, H. C., Liu, C. Y., Huang, Y. T., & Kernohan, W. G. (2010). Community‐based interventions to reduce falls among older adults in Taiwan–long time follow‐up randomised controlled study. *Journal of clinical nursing, 19*(7‐8), 959-968.

Huang, Y., Han, J., Gu, Q., Cai, Y., Li, J., Wang, S., Liu, X. (2022). Effect of Yijinjing combined with elastic band exercise on muscle mass and function in middle-aged and elderly patients with prediabetes: A randomized controlled trial. *Frontiers in Medicine, 9*, 990100.

Kantatong, T., Panpanich, R., Deesomchok, A., Sungkarat, S., & Siviroj, P. (2020). Effects of the tai chi qigong programme on functional capacity, and lung function in chronic obstructive pulmonary disease patients: a ramdomised controlled trial. *Journal of Traditional and Complementary Medicine, 10*(4), 354-359.

Kim, C.-Y., Je, H.-D., Jeong, H., Jeong, J.-H., & Kim, H.-D. (2020). Effects of Tai Chi versus Taekkyon on balance, lower-extremity strength, and gait ability in community-dwelling older women: A single-blinded randomized clinical trial. *Journal of back and musculoskeletal rehabilitation, 33*(1), 41-48.

Li, F., Harmer, P., Fisher, K. J., McAuley, E., Chaumeton, N., Eckstrom, E., & Wilson, N. L. (2005). Tai Chi and fall reductions in older adults: a randomized controlled trial. *The Journals of Gerontology Series A: Biological Sciences and Medical Sciences, 60*(2), 187-194.

Li, F., Harmer, P., Voit, J., & Chou, L.-S. (2021). Implementing an online virtual falls prevention intervention during a public health pandemic for older adults with mild cognitive impairment: a feasibility trial. *Clinical interventions in aging*, 973-983.

Li, J. X., Xu, D. Q., & Hong, Y. (2008). Effects of 16-week Tai Chi intervention on postural stability and proprioception of knee and ankle in older people. *Age and ageing, 37*(5), 575-578.

Li, L., Cheng, S., Wang, G., Duan, G., & Zhang, Y. (2019). Tai chi chuan exercises improve functional outcomes and quality of life in patients with primary total knee arthroplasty due to knee osteoarthritis. *Complementary Therapies in Clinical Practice, 35*, 121-125.

Li, P., Liu, J., Lu, Y., Liu, X., Wang, Z., & Wu, W. (2018). Effects of long-term home-based Liuzijue exercise combined with clinical guidance in elderly patients with chronic obstructive pulmonary disease. *Clinical interventions in aging*, 1391-1399.

Li ZF, Deng F, Zhang YJ, Peng RD, lI JJ, Chen W, & Xu TH. (2019). The effect of Baduanjin in improving balance ability and fall risk in elderly osteoporosis. *Western J Tradit Chin Med, 32*(9), 4.

Logghe, I. H., Zeeuwe, P. E., Verhagen, A. P., Wijnen‐Sponselee, R. M., Willemsen, S. P., Bierma‐Zeinstra, S. M., . . . Koes, B. W. (2009). Lack of effect of Tai Chi Chuan in preventing falls in elderly people living at home: a randomized clinical trial. *Journal of the American Geriatrics Society, 57*(1), 70-75.

Lu T, & Song QH. (2015). Effects of Tai Chi, walking and dance exercise on lower limb muscle strength, bone mineral density and balance ability in elderly women. *Chinese J Phys Med Rehabil, 37*(2), 124-127.

Luo KL, Jin XM, Ma SJ, Xue X, XH, L., XR, M., & J, H. (2022). Luo KL, Jin XM, Ma SJ, et al. Effect of tendon training on balance function and plantar pressure in stroke patients. *Rehabil Med, 32*(02), 117-123.

Penn, I.-W., Sung, W.-H., Lin, C.-H., Chuang, E., Chuang, T.-Y., & Lin, P.-H. (2019). Effects of individualized Tai-Chi on balance and lower-limb strength in older adults. *BMC geriatrics, 19*, 1-8.

Pluchino, A., Lee, S. Y., Asfour, S., Roos, B. A., & Signorile, J. F. (2012). Pilot study comparing changes in postural control after training using a video game balance board program and 2 standard activity-based balance intervention programs. *Archives of physical medicine and rehabilitation, 93*(7), 1138-1146.

Saravanakumar, P., Johanna Higgins, I., Jane van der Riet, P., Marquez, J., & Sibbritt, D. (2014). The influence of tai chi and yoga on balance and falls in a residential care setting: a randomised controlled trial. *Contemporary nurse, 48*(1), 76-87.

Son, N., Ryu, Y. U., Jeong, H., Jang, Y., & Kim, H. (2016). Comparison of 2 different exercise approaches: Tai Chi versus Otago, in community-dwelling older women. *Journal of geriatric physical therapy, 39*(2), 51-57.

Song, J., Wei, L., Cheng, K., Lin, Q., Xia, P., Wang, X, Ding, A. (2022). The effect of modified tai chi exercises on the physical function and quality of life in elderly women with knee osteoarthritis. *Frontiers in aging neuroscience, 14*, 860762.

Sun G, Chao F, & Wang AL. (2008). Influence of Fitness Qigong (Baduanjin) on Blood Lipid and Physiological Function of the Elder Male People. *China Sport Sci Technol, 44*(2), 81-84.

Sun, W., Ma, X., Wang, L., Zhang, C., Song, Q., Gu, H., & Mao, D. (2019). Effects of Tai Chi Chuan and brisk walking exercise on balance ability in elderly women: a randomized controlled trial. *Motor control, 23*(1), 100-114.

Taylor, D., Hale, L., Schluter, P., Waters, D. L., Binns, E. E., McCracken, H, Wolf, S. L. (2012). Effectiveness of tai chi as a community‐based falls prevention intervention: A randomized controlled trial. *Journal of the American Geriatrics Society, 60*(5), 841-848.

Tousignant, M., Corriveau, H., Roy, P.-M., Desrosiers, J., Dubuc, N., & Hébert, R. (2013). Efficacy of supervised Tai Chi exercises versus conventional physical therapy exercises in fall prevention for frail older adults: a randomized controlled trial. *Disability and rehabilitation, 35*(17), 1429-1435.

Wang C, Zhang PZ, Yang FM, & Yu JW. (2022). Effect of Liuzijue training on balance and respiratory function of stroke patients in recovery stage. *Rehabil Med, 32*(04), 306-313.

Wang WH, Bi HY, Qiu ZG, Liu XH, Zhuang H, Hao SJ, WY, S. (2020). Wang WH,Bi HY, Qiu ZG, et al. Effect of visual tracking training combined with Liuzijue formula on motor function and quality of life in patients with Parkinson's disease. *Rehabil Med, 30*(6), 474-478.

Wu YC, & Wei QP. (2015). Clinical effect of Baduanjin in adjuvant treatment of type 2 diabetes. *Chinese J Gerontol, 35*(18), 5218-5219.

Xiao, C. M., Li, J. J., Kang, Y., & Zhuang, Y. C. (2021). Follow-up of a Wuqinxi exercise at home programme to reduce pain and improve function for knee osteoarthritis in older people: a randomised controlled trial. *Age and ageing, 50*(2), 570-575.

Xiao, C. M., & Zhuang, Y. C. (2015). Efficacy of Liuzijue Qigong in individuals with chronic obstructive pulmonary disease in remission. *Journal of the American Geriatrics Society, 63*(7), 1420-1425.

Xiao, C. M., & Zhuang, Y. C. (2016). Effect of health Baduanjin Qigong for mild to moderate P arkinson's disease. *Geriatrics & gerontology international, 16*(8), 911-919.

Yao Y. (2008). Effect of 6-month Tai Chi flexible ball practice on static balance ability in older adults. *Chinese J Sports Med.* (5), 612-613.

Yıldırım, P., Ofluoglu, D., Aydogan, S., & Akyuz, G. (2016). Tai Chi vs. combined exercise prescription: a comparison of their effects on factors related to falls. *Journal of back and musculoskeletal rehabilitation, 29*(3), 493-501.

Zhai FM, Chen YJ, Huang ZF, & Li L. (2013). The influence of Baduanjin exercise on the physiological function of the elderly. *Chinese J Gerontol, 33*(6), 1402-1404.

Zhang FL, Shu HY, Ren LL, Yan C, Liu JW, Miu GX, & XB, C. (2023). Study on efficacy of modified Wuqinxi on gait and balance dysfunction in elderly stroke patients and on brain mechanism based on fMRI. *J Pract Med, 39*(9), 1174-1178.

Zhang, T., Hu, Y., Nie, Z., Jin, R., Chen, F., Guan, Q, Jin, L.-J. (2015). Effects of tai chi and multimodal exercise training on movement and balance function in mild to moderate idiopathic Parkinson disease. *American journal of physical medicine & rehabilitation, 94*(10S), 921-929.

Zheng, Y., Zhang, Y., Li, H., Yong, Z., WeijieYu, LongLi, YanminFan, H. (2021). Comparative Effect of Liuzijue Qigong and Conventional Respiratory Training on Trunk Control Ability and Respiratory Muscle Function in Patients at an Early Recovery Stage From Stroke: A Randomized Controlled Trial. *Archives of physical medicine and rehabilitation, 102*(3).

Zhu HX, Zheng ZY, & Chen XL. (2008). The influence of 16 weeks of new wuqinxi exercise on the physical function related indicators of elderly women. *Chinese J Sports Med*(4), 499-500.

Zhu YQ, Peng N, & Zhou M. (2016). Effect of Taijiquan on lower limb muscle strength and function in the elderly. *Chinese J Integr Tradit West Med, 36*(1), 49-53.
